# Supplementary material for: Effects of tetracycline on simultaneous biological wastewater nitrogen and phosphorus removal
Source: Royal Society of Chemistry journal article supplement (doi:10.1039/c5ra08434b), 2015-01-01
Supplement: c5ra08434b1.pdf [file c5ra08434b1.pdf]

[Electronic Supplementary Information](#)

**Effects of tetracycline on simultaneous biological wastewater nitrogen and  
phosphorus removal**

A. Chen,<sup>a</sup> Y.Chen,<sup>\*a</sup> C. Ding,<sup>b</sup> H. Liang<sup>b</sup> and B. Yang<sup>b</sup>

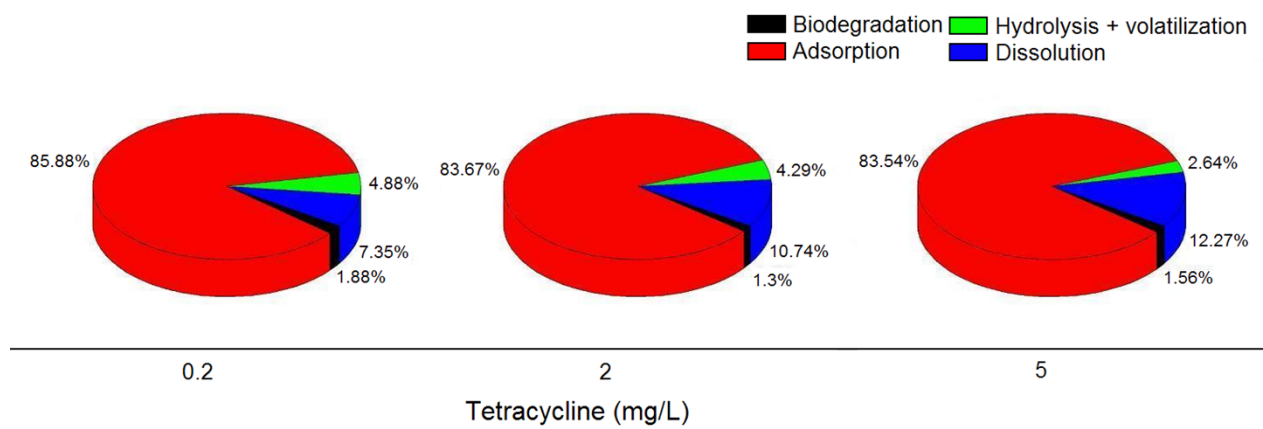

**Fig. S1 The percentages of biodegradation, hydrolysis and volatilization, adsorption, and dissolution of tetracycline during biological wastewater treatment.**

**Table S1 The designed exposure experiments.**

| No.  | Tetracycline <sup>a</sup> | Activated sludge | 0.1% NaN <sub>3</sub> |
|------|---------------------------|------------------|-----------------------|
| C-11 | 0                         | + <sup>b</sup>   | - <sup>b</sup>        |
| C-12 | 0                         | +                | +                     |
| C-13 | 0                         | -                | +                     |
| T-11 | 0.2                       | +                | -                     |
| T-12 | 0.2                       | +                | +                     |
| T-13 | 0.2                       | -                | +                     |
| T-21 | 2                         | +                | -                     |
| T-22 | 2                         | +                | +                     |
| T-23 | 2                         | -                | +                     |
| T-31 | 5                         | +                | -                     |
| T-32 | 5                         | +                | +                     |
| T-33 | 5                         | -                | +                     |

<sup>a</sup> The unit is mg/L;

<sup>b</sup> “+” (with), “-” (without).
